# Supplementary material for: Alcohol Use Disorders and Increased Risk of Adverse Birth Complications and Outcomes: An 11-Year Nationwide Cohort Study
Source: MDPI journal article supplement (doi:10.3390/ijerph17228515), 2020-11-17
Supplement: s1 [file s1]

**Table S1.** ICD-10 codes for pregnancy and adverse birth complications.

| Variables                                                                 | ICD-10* Code                 |
|---------------------------------------------------------------------------|------------------------------|
| <b>Pregnancy</b>                                                          |                              |
| Pregnancy confirmed                                                       | Z32.1                        |
| Pregnant state, incidental                                                | Z33                          |
| Supervision of normal first pregnancy, less than 24 weeks pregnant        | Z34.00                       |
| Supervision of other normal pregnancy, less than 24 weeks pregnant        | Z34.80                       |
| Supervision of normal pregnancy, unspecified, less than 24 weeks pregnant | Z34.90                       |
| Supervision of high-risk pregnancy                                        | Z35                          |
| Multiple gestation                                                        | O30                          |
| <b>Adverse Birth Complications</b>                                        |                              |
| Gestational hypertension                                                  | O13                          |
| Gestational diabetes                                                      | O24                          |
| PROM (premature rupture of membranes)                                     | O42                          |
| Placenta previa                                                           | O44                          |
| Abruptio placentae                                                        | O45                          |
| Postpartum hemorrhage                                                     | O72                          |
| Meconium stained amniotic fluid                                           | P96                          |
| Fetal asphyxia                                                            | P21                          |
| Preterm birth                                                             | O60 (O600, O601, O602, O603) |
| Low birth weight                                                          | P07                          |
| IUGR (intrauterine growth retardation)                                    | O365                         |
| <b>Adverse Birth Complications</b>                                        |                              |
| Complete or unspecific spontaneous abortion without complication          | O03.4                        |
| Incomplete spontaneous abortion without complication                      | O03.9                        |
| Missed abortion                                                           | O20.1                        |
| Threatened abortion                                                       | O02.0                        |
| *International Classification of Diseases, Tenth Revision                 |                              |
